# Supplementary material for: Detection of firearm discharge residue from skin swabs using trapped ion mobility spectrometry coupled to mass spectrometry
Source: Royal Society of Chemistry journal article supplement (doi:10.1039/c8ay00658j), 2018-01-01
Supplement: c8ay00658j1.pdf [file c8ay00658j1.pdf]

## Supporting Information

# Detection of firearm discharge residue from skin swabs using Trapped Ion Mobility Spectrometry coupled to Mass Spectrometry

Alan McKenzie-Coe,<sup>a</sup> Suzanna Bell,<sup>b</sup> and Francisco Fernandez-Lima<sup>a,c\*</sup>

<sup>a</sup>*Department of Chemistry and Biochemistry, Florida International University, Miami, FL 33199, USA. E-mail: fernandf@fiu.edu*

<sup>b</sup>*C. Eugene Bennett Department of Chemistry, The Department Forensic and Investigative Sciences, West Virginia University, 1600 University Avenue, Oglebay Hall Room 208, Morgantown, WV 26506, USA*

<sup>c</sup>*Biomolecular Science Institute, Florida International University, Miami, FL 33199, USA*

### Table of contents:

- **Figure S1. Scheme of the TIMS analyzer**
- **Table S1. Geometry coordinates of 15-5 Crown Ether and Copper optimized structure**
- **Table S2. Geometry coordinates of 15-5 Crown Ether and Potassium optimized structure**
- **Table S3. Geometry coordinates of 15-5 Crown Ether, Potassium, and 15-5 Crown Ether optimized structure**
- **Table S4. Geometry coordinates of 15-5 Crown Ether, Barium, and Nitrate optimized structure**
- **Table S5. Geometry coordinates of 15-5 Crown Ether, Barium, and 15-5 Crown Ether optimized structure**
- **Table S6. Geometry coordinates of 15-5 Crown Ether, Lead, and Nitrate optimized structure**
- **Table S7. Geometry coordinates of 15-5 Crown Ether, Lead, and 15-5 Crown Ether optimized structure**

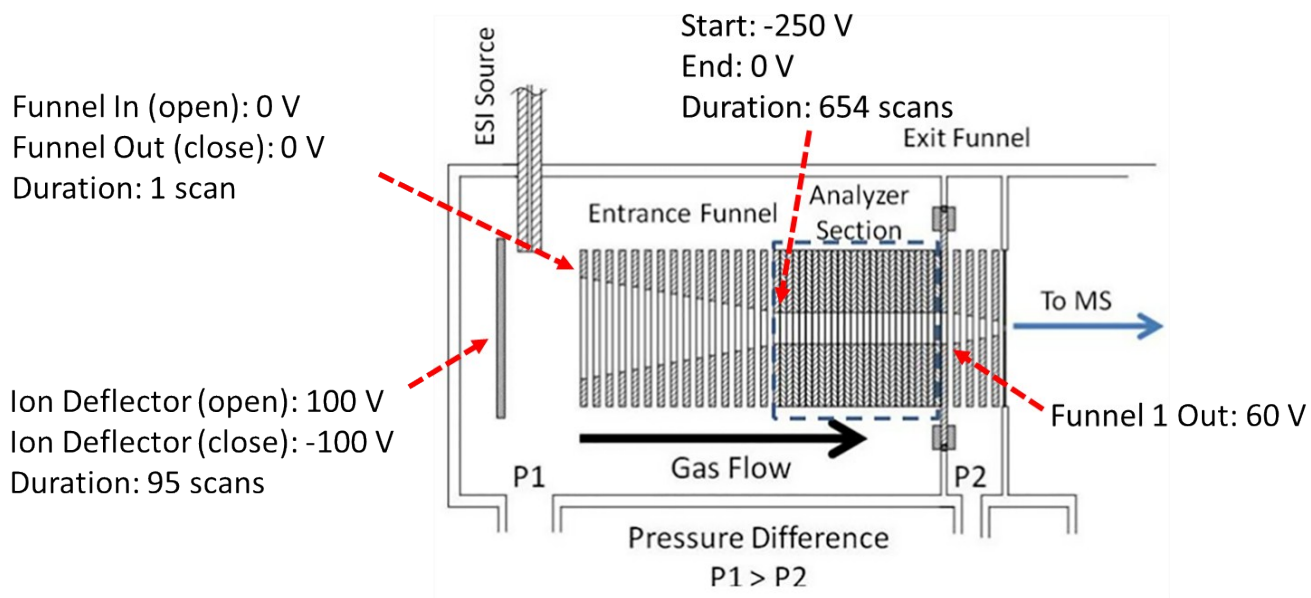

**Figure S1. Scheme of the TIMS cell.**

**Table S1. Geometry coordinates of 15-5 Crown Ether and Copper optimized structure**

| Element | x         | y         | z         |
|---------|-----------|-----------|-----------|
| O       | -0.363222 | 2.149494  | 0.410556  |
| O       | -2.238633 | 0.406092  | -0.545466 |
| O       | 2.026119  | 1.055537  | -0.324598 |
| O       | -1.012784 | -1.984866 | -0.112281 |
| O       | 1.631153  | -1.566010 | 0.273230  |
| C       | -1.691006 | 2.606300  | 0.119546  |
| C       | 0.677642  | 3.006118  | -0.076736 |
| C       | -2.641909 | 1.448604  | 0.349619  |
| C       | 2.004392  | 2.360136  | 0.266211  |
| C       | -3.017522 | -0.797764 | -0.532114 |
| C       | 3.139948  | 0.247480  | 0.075722  |
| C       | -2.365725 | -1.864943 | 0.337669  |
| C       | 2.859702  | -1.180331 | -0.349581 |
| C       | -0.234267 | -3.006144 | 0.520676  |
| C       | 1.175885  | -2.888228 | -0.026312 |
| H       | -1.746218 | 2.931366  | -0.927943 |
| H       | -1.948273 | 3.449580  | 0.773903  |
| H       | 0.613110  | 3.992302  | 0.402132  |
| H       | 0.571395  | 3.128127  | -1.163435 |
| H       | -2.593568 | 1.106494  | 1.392781  |
| H       | -3.669064 | 1.764827  | 0.124710  |
| H       | 2.828198  | 2.969887  | -0.128549 |
| H       | 2.116143  | 2.270758  | 1.355529  |
| H       | -3.055110 | -1.139032 | -1.570634 |
| H       | -4.040058 | -0.596899 | -0.190080 |
| H       | 3.254473  | 0.298760  | 1.166965  |
| H       | 4.060687  | 0.610950  | -0.399578 |

|    |           |           |           |
|----|-----------|-----------|-----------|
| H  | -2.377445 | -1.594361 | 1.403731  |
| H  | -2.895578 | -2.819295 | 0.212027  |
| H  | 2.762098  | -1.255647 | -1.441733 |
| H  | 3.679363  | -1.832279 | -0.018587 |
| H  | -0.648007 | -3.995993 | 0.287278  |
| H  | -0.242769 | -2.860779 | 1.609868  |
| H  | 1.829349  | -3.632955 | 0.447508  |
| H  | 1.180084  | -3.047352 | -1.113575 |
| Cu | 0.018527  | 0.006283  | -0.135932 |

**Table S2. Geometry coordinates of 15-5 Crown Ether and Potassium optimized structure**

| Element | x         | y         | z         |
|---------|-----------|-----------|-----------|
| O       | 0.068157  | -2.071720 | -0.371500 |
| O       | -2.351370 | -0.876620 | 0.443570  |
| O       | 2.421956  | -0.704988 | 0.207586  |
| O       | -1.494283 | 1.846721  | 0.046693  |
| O       | 1.269991  | 1.757224  | -0.298354 |
| C       | -1.144963 | -2.818096 | -0.284232 |
| C       | 1.270821  | -2.799544 | -0.127861 |
| C       | -2.295464 | -1.873100 | -0.583179 |
| C       | 2.443284  | -1.924787 | -0.539724 |
| C       | -3.253803 | 0.210551  | 0.205863  |
| C       | 3.186229  | 0.355841  | -0.374632 |
| C       | -2.643878 | 1.331231  | -0.628316 |
| C       | 2.638167  | 1.694204  | 0.094974  |
| C       | -0.795818 | 2.857487  | -0.687145 |
| C       | 0.607274  | 3.006681  | -0.123416 |
| H       | -1.258338 | -3.257281 | 0.719236  |
| H       | -1.146783 | -3.635027 | -1.020518 |
| H       | 1.295288  | -3.722584 | -0.725267 |
| H       | 1.337885  | -3.082850 | 0.935110  |
| H       | -2.137499 | -1.408361 | -1.565491 |
| H       | -3.238514 | -2.437565 | -0.606385 |
| H       | 3.384022  | -2.467159 | -0.366201 |
| H       | 2.361368  | -1.697383 | -1.611031 |
| H       | -3.526550 | 0.590948  | 1.195429  |
| H       | -4.169704 | -0.149599 | -0.282449 |
| H       | 3.108206  | 0.305185  | -1.468580 |
| H       | 4.245037  | 0.266866  | -0.092780 |

|   |           |           |           |
|---|-----------|-----------|-----------|
| H | -2.349973 | 0.971290  | -1.625352 |
| H | -3.398373 | 2.121621  | -0.761224 |
| H | 2.731139  | 1.802401  | 1.188724  |
| H | 3.219792  | 2.502111  | -0.372548 |
| H | -1.330155 | 3.815700  | -0.617303 |
| H | -0.729682 | 2.567345  | -1.744831 |
| H | 1.131790  | 3.806270  | -0.666650 |
| H | 0.575482  | 3.284528  | 0.943031  |
| K | 0.026782  | -0.001275 | 1.400376  |

**Table S3. Geometry coordinates of 15-5 Crown Ether, Potassium, and 15-5 Crown Ether optimized structure**

| Element | x        | y         | z         |
|---------|----------|-----------|-----------|
| O       | 1.697400 | -1.136800 | -2.248700 |
| O       | 1.538100 | -2.517300 | 0.292900  |
| O       | 2.067800 | 1.547700  | -1.560400 |
| O       | 2.442600 | -0.321400 | 1.815700  |
| O       | 1.836400 | 2.304400  | 1.095700  |
| C       | 2.398000 | -2.355200 | -2.015200 |
| C       | 2.412600 | -0.232100 | -3.087100 |
| C       | 1.657000 | -3.175400 | -0.968200 |
| C       | 1.861100 | 1.170000  | -2.911300 |
| C       | 2.688900 | -2.581900 | 1.130500  |
| C       | 1.752600 | 2.897900  | -1.240400 |
| C       | 2.477700 | -1.653800 | 2.310900  |
| C       | 2.363700 | 3.199400  | 0.116600  |
| C       | 2.367400 | 0.690900  | 2.807900  |
| C       | 2.733200 | 2.016300  | 2.165400  |
| H       | 3.424000 | -2.129900 | -1.688100 |
| H       | 2.465800 | -2.946800 | -2.942900 |
| H       | 2.328400 | -0.537200 | -4.141700 |
| H       | 3.476600 | -0.231800 | -2.810100 |
| H       | 0.629500 | -3.355600 | -1.294600 |
| H       | 2.162100 | -4.146500 | -0.850900 |
| H       | 2.395100 | 1.849600  | -3.594600 |
| H       | 0.790800 | 1.207000  | -3.167400 |
| H       | 3.590600 | -2.269900 | 0.586500  |
| H       | 2.836400 | -3.612300 | 1.490200  |
| H       | 0.663100 | 3.045800  | -1.238700 |

|   |           |           |           |
|---|-----------|-----------|-----------|
| H | 2.192700  | 3.586800  | -1.979200 |
| H | 1.538700  | -1.899600 | 2.830900  |
| H | 3.310400  | -1.778100 | 3.020900  |
| H | 3.452100  | 3.070700  | 0.048900  |
| H | 2.156200  | 4.244200  | 0.395400  |
| H | 3.082200  | 0.494500  | 3.622600  |
| H | 1.358500  | 0.723100  | 3.247900  |
| H | 2.704000  | 2.813500  | 2.924900  |
| H | 3.758500  | 1.946200  | 1.777100  |
| K | -0.000800 | -0.066700 | 0.000400  |
| O | -2.447100 | -0.286200 | -1.817100 |
| O | -1.574900 | -2.496200 | -0.296300 |
| O | -1.804000 | 2.328100  | -1.092200 |
| O | -1.712200 | -1.118400 | 2.248300  |
| O | -2.044600 | 1.571300  | 1.563300  |
| C | -2.502000 | -1.617300 | -2.313600 |
| C | -2.354800 | 0.725600  | -2.808300 |
| C | -2.726400 | -2.543600 | -1.134200 |
| C | -2.701700 | 2.055900  | -2.165400 |
| C | -1.703400 | -3.154700 | 0.963600  |
| C | -2.321400 | 3.227800  | -0.112200 |
| C | -2.431600 | -2.325300 | 2.012200  |
| C | -1.713600 | 2.918000  | 1.244400  |
| C | -2.413200 | -0.204500 | 3.088800  |
| C | -1.841900 | 1.189700  | 2.913800  |
| H | -1.567000 | -1.876400 | -2.834400 |
| H | -3.336800 | -1.728600 | -3.023400 |
| H | -3.071000 | 0.540600  | -3.624600 |
| H | -1.344700 | 0.742800  | -3.246500 |



|   |           |           |           |
|---|-----------|-----------|-----------|
| H | -3.623700 | -2.219600 | -0.589900 |
| H | -2.888400 | -3.571400 | -1.495100 |
| H | -2.657000 | 2.853600  | -2.923700 |
| H | -3.729300 | 2.002000  | -1.780900 |
| H | -0.678700 | -3.351100 | 1.289600  |
| H | -2.223200 | -4.117800 | 0.844800  |
| H | -3.411100 | 3.110900  | -0.044600 |
| H | -2.102400 | 4.270600  | -0.389700 |
| H | -3.454000 | -2.083200 | 1.685500  |
| H | -2.508700 | -2.917600 | 2.938700  |
| H | -0.622400 | 3.053300  | 1.242700  |
| H | -2.145600 | 3.611200  | 1.983800  |
| H | -2.331800 | -0.512200 | 4.143000  |
| H | -3.477500 | -0.188600 | 2.813500  |
| H | -2.365700 | 1.876200  | 3.598000  |
| H | -0.771000 | 1.211500  | 3.169000  |

**Table S4. Geometry coordinates of 15-5 Crown Ether, Barium, and Nitrate optimized structure**

| Element | x         | y         | z         |
|---------|-----------|-----------|-----------|
| O       | 0.498710  | 2.444829  | 0.346501  |
| O       | 2.407321  | 0.858152  | -1.140559 |
| O       | -0.890977 | 0.657103  | 1.973853  |
| O       | 2.019017  | -1.606939 | 0.015291  |
| O       | -0.375139 | -1.964382 | 1.259420  |
| C       | 1.917142  | 2.467986  | 0.602132  |
| C       | -0.327340 | 2.882057  | 1.449914  |
| C       | 2.618387  | 2.196782  | -0.669072 |
| C       | -1.451449 | 1.947458  | 1.651787  |
| C       | 3.495584  | -0.048198 | -0.875126 |
| C       | -1.883751 | -0.375084 | 2.173128  |
| C       | 2.997155  | -1.426425 | -1.021232 |
| C       | -1.163596 | -1.637487 | 2.421066  |
| C       | 1.511918  | -2.932950 | 0.253816  |
| C       | 0.733785  | -2.840962 | 1.502208  |
| H       | 2.101027  | 1.725985  | 1.365939  |
| H       | 2.133483  | 3.487576  | 0.878765  |
| H       | -0.726770 | 3.828934  | 1.132979  |
| H       | 0.286457  | 2.892626  | 2.335192  |
| H       | 2.179576  | 2.828258  | -1.427432 |
| H       | 3.672546  | 2.371745  | -0.548610 |
| H       | -1.952810 | 2.273089  | 2.545506  |
| H       | -2.146668 | 1.840544  | 0.808689  |
| H       | 3.818907  | 0.106994  | 0.139489  |
| H       | 4.205240  | 0.148445  | -1.661553 |
| H       | -2.565061 | -0.382047 | 1.310526  |
| H       | -2.373920 | -0.122190 | 3.096163  |

|    |           |           |           |
|----|-----------|-----------|-----------|
| H  | 2.529225  | -1.553577 | -1.987172 |
| H  | 3.814045  | -2.094988 | -0.825221 |
| H  | -0.486508 | -1.498412 | 3.246825  |
| H  | -1.888307 | -2.425077 | 2.516978  |
| H  | 2.353909  | -3.573238 | 0.441703  |
| H  | 0.876331  | -3.240029 | -0.564719 |
| H  | 0.330431  | -3.800285 | 1.770431  |
| H  | 1.357404  | -2.347829 | 2.231188  |
| Ba | -0.082254 | 0.001057  | -0.503341 |
| N  | -3.027298 | -0.168336 | -1.739530 |
| O  | -2.006943 | -0.660832 | -2.327976 |
| O  | -4.150380 | -0.234346 | -2.200832 |
| O  | -2.802638 | 0.413108  | -0.597394 |

**Table S5. Geometry coordinates of 15-5 Crown Ether, Barium, and 15-5 Crown Ether optimized structure**

| Element | x         | y         | z         |
|---------|-----------|-----------|-----------|
| O       | -2.051510 | -2.137849 | 0.479903  |
| O       | -1.439204 | -1.290299 | -2.175914 |
| O       | -1.850529 | 0.019578  | 2.118204  |
| O       | -1.906771 | 1.382239  | -1.688447 |
| O       | -1.688792 | 2.399636  | 0.856937  |
| C       | -2.728500 | -2.722875 | -0.640780 |
| C       | -2.874203 | -2.074052 | 1.654756  |
| C       | -1.820058 | -2.642778 | -1.858029 |
| C       | -2.165808 | -1.246217 | 2.713018  |
| C       | -2.395883 | -0.565201 | -2.968199 |
| C       | -1.791952 | 1.193440  | 2.939839  |
| C       | -1.974731 | 0.890787  | -3.033583 |
| C       | -2.362805 | 2.341600  | 2.123306  |
| C       | -1.894495 | 2.809028  | -1.518102 |
| C       | -2.438601 | 3.117494  | -0.135369 |
| H       | -3.677149 | -2.193718 | -0.808486 |
| H       | -2.960702 | -3.777943 | -0.436061 |
| H       | -3.066451 | -3.085901 | 2.037850  |
| H       | -3.834322 | -1.606188 | 1.397802  |
| H       | -0.884375 | -3.171869 | -1.660208 |
| H       | -2.310669 | -3.110804 | -2.720759 |
| H       | -2.835958 | -1.113519 | 3.571288  |
| H       | -1.244607 | -1.735549 | 3.053326  |
| H       | -3.392849 | -0.638616 | -2.517028 |
| H       | -2.432531 | -0.987633 | -3.981154 |
| H       | -0.752066 | 1.384161  | 3.238831  |

|    |           |           |           |
|----|-----------|-----------|-----------|
| H  | -2.393162 | 1.064383  | 3.847856  |
| H  | -1.000525 | 1.001393  | -3.531413 |
| H  | -2.723352 | 1.452277  | -3.607436 |
| H  | -3.432864 | 2.165816  | 1.952963  |
| H  | -2.245000 | 3.290145  | 2.665408  |
| H  | -2.543997 | 3.286231  | -2.262950 |
| H  | -0.874044 | 3.191074  | -1.643494 |
| H  | -2.382666 | 4.199008  | 0.050947  |
| H  | -3.490582 | 2.807863  | -0.081631 |
| Ba | -0.086228 | 0.004943  | -0.027553 |
| O  | 1.224231  | -1.658205 | 1.908551  |
| O  | 1.471168  | -2.324724 | -0.814225 |
| O  | 2.051950  | 1.011242  | 1.799478  |
| O  | 2.221479  | 0.147009  | -1.972156 |
| O  | 1.374016  | 2.420419  | -0.569469 |
| C  | 1.556152  | -2.989789 | 1.476818  |
| C  | 1.974536  | -1.072627 | 2.984891  |
| C  | 2.303489  | -2.978917 | 0.154358  |
| C  | 2.862928  | 0.059136  | 2.499662  |
| C  | 2.026494  | -2.233757 | -2.136813 |
| C  | 2.766947  | 2.204821  | 1.452205  |
| C  | 2.955566  | -1.042351 | -2.289970 |
| C  | 1.858882  | 3.084684  | 0.608629  |
| C  | 3.032764  | 1.325051  | -2.024717 |
| C  | 2.146812  | 2.534159  | -1.775029 |
| H  | 0.606851  | -3.522760 | 1.361445  |
| H  | 2.152467  | -3.504712 | 2.238683  |
| H  | 2.587051  | -1.830293 | 3.487047  |
| H  | 1.247088  | -0.689879 | 3.709556  |

|   |          |           |           |
|---|----------|-----------|-----------|
| H | 3.265344 | -2.457104 | 0.249972  |
| H | 2.499849 | -4.012994 | -0.162521 |
| H | 3.341453 | 0.534897  | 3.367658  |
| H | 3.653597 | -0.310178 | 1.830269  |
| H | 1.170751 | -2.126966 | -2.809539 |
| H | 2.557226 | -3.159758 | -2.392506 |
| H | 3.686525 | 1.938975  | 0.912794  |
| H | 3.053055 | 2.749456  | 2.363483  |
| H | 3.829489 | -1.121469 | -1.627224 |
| H | 3.319602 | -0.997227 | -3.326179 |
| H | 0.964185 | 3.354053  | 1.178002  |
| H | 2.385026 | 4.008156  | 0.336882  |
| H | 3.495616 | 1.423759  | -3.017420 |
| H | 3.838567 | 1.248151  | -1.281222 |
| H | 2.757203 | 3.445166  | -1.755431 |
| H | 1.422186 | 2.631086  | -2.590673 |

**Table S6. Geometry coordinates of 15-5 Crown Ether, Lead, and Nitrate optimized structure**

| Element | x         | y         | z         |
|---------|-----------|-----------|-----------|
| O       | -1.740927 | 0.362579  | 1.030866  |
| O       | -0.506503 | 2.417277  | -0.437231 |
| O       | -0.304171 | -1.903387 | 0.644663  |
| O       | 1.974784  | 1.067106  | -0.630733 |
| O       | 1.849713  | -1.709853 | -0.993388 |
| C       | -1.754671 | 1.704244  | 1.549764  |
| C       | -1.733569 | -0.652172 | 2.054151  |
| C       | -1.657072 | 2.682893  | 0.387555  |
| C       | -1.516165 | -2.009634 | 1.410558  |
| C       | 0.734722  | 3.001905  | -0.000928 |
| C       | 0.256246  | -3.120583 | 0.119293  |
| C       | 1.859332  | 2.471185  | -0.869725 |
| C       | 1.729977  | -2.854959 | -0.144454 |
| C       | 2.954034  | 0.390109  | -1.425269 |
| C       | 3.102863  | -1.024933 | -0.896060 |
| H       | -0.919098 | 1.820853  | 2.253645  |
| H       | -2.694332 | 1.877235  | 2.090764  |
| H       | -2.693373 | -0.639436 | 2.585718  |
| H       | -0.923605 | -0.433672 | 2.762408  |
| H       | -2.520434 | 2.581254  | -0.274212 |
| H       | -1.620709 | 3.710721  | 0.768209  |
| H       | -1.393912 | -2.762171 | 2.199844  |
| H       | -2.350595 | -2.291810 | 0.759577  |
| H       | 0.926948  | 2.750739  | 1.049611  |
| H       | 0.669386  | 4.092494  | -0.104437 |
| H       | -0.282739 | -3.418994 | -0.789879 |
| H       | 0.160537  | -3.925509 | 0.858307  |

|    |           |           |           |
|----|-----------|-----------|-----------|
| H  | 1.650984  | 2.667468  | -1.932272 |
| H  | 2.794613  | 2.981713  | -0.600183 |
| H  | 2.237439  | -2.657085 | 0.808959  |
| H  | 2.190491  | -3.735062 | -0.614398 |
| H  | 3.924768  | 0.899428  | -1.347983 |
| H  | 2.649642  | 0.390928  | -2.482994 |
| H  | 3.872303  | -1.552930 | -1.476542 |
| H  | 3.418568  | -0.986564 | 0.155096  |
| N  | -3.473836 | -0.522741 | -1.805649 |
| O  | -4.654112 | -0.704187 | -1.988944 |
| O  | -2.925166 | 0.640793  | -1.908323 |
| O  | -2.672325 | -1.492759 | -1.483111 |
| Pb | -0.620027 | -0.112469 | -1.282288 |



**Table S7. Geometry coordinates of 15-5 Crown Ether, Lead, and 15-5 Crown Ether optimized structure**

| Element | x         | y         | z         |
|---------|-----------|-----------|-----------|
| O       | -2.346863 | 0.137746  | 1.855981  |
| O       | -1.701538 | -2.220601 | 0.450292  |
| O       | -1.333020 | 2.421410  | 0.598369  |
| O       | -0.902348 | -1.526949 | -2.174737 |
| O       | -1.834595 | 1.127711  | -1.896931 |
| C       | -3.211482 | -0.996776 | 1.955801  |
| C       | -3.014971 | 1.383018  | 2.065381  |
| C       | -2.377114 | -2.242699 | 1.718744  |
| C       | -2.000273 | 2.496734  | 1.865764  |
| C       | -2.477192 | -2.668953 | -0.667706 |
| C       | -1.928920 | 3.095610  | -0.520960 |
| C       | -1.547586 | -2.776376 | -1.864059 |
| C       | -2.710312 | 2.165197  | -1.435328 |
| C       | -1.402755 | -0.768257 | -3.288544 |
| C       | -2.432654 | 0.269386  | -2.875337 |
| H       | -4.028653 | -0.904304 | 1.224927  |
| H       | -3.659234 | -1.048653 | 2.958809  |
| H       | -3.412946 | 1.434548  | 3.089235  |
| H       | -3.860389 | 1.473942  | 1.368546  |
| H       | -1.585246 | -2.303266 | 2.468878  |
| H       | -3.005784 | -3.138817 | 1.794822  |
| H       | -2.485509 | 3.473566  | 1.984734  |
| H       | -1.207652 | 2.414139  | 2.615820  |
| H       | -3.307530 | -1.977174 | -0.863290 |
| H       | -2.897229 | -3.661801 | -0.453817 |
| H       | -1.099199 | 3.539355  | -1.077968 |
| H       | -2.587046 | 3.901040  | -0.172478 |

H -0.745309 -3.484979 -1.637649  
H -2.102171 -3.141600 -2.736330  
H -3.573296 1.715162 -0.925327  
H -3.081708 2.745065 -2.292210  
H -1.830079 -1.439209 -4.043056  
H -0.530665 -0.272903 -3.726335  
H -2.727394 0.855727 -3.757416  
H -3.336171 -0.198277 -2.458196  
Pb 0.008779 -0.009602 -0.014542  
O 0.884506 -1.340308 2.262698  
O 1.695215 -2.271681 -0.268069  
O 1.794974 1.293675 1.800880  
O 2.385655 -0.026947 -1.822828  
O 1.346881 2.365555 -0.804526  
C 1.513653 -2.623458 2.082084  
C 1.355736 -0.495162 3.325631  
C 2.453969 -2.640180 0.889750  
C 2.383738 0.517665 2.851684  
C 2.384696 -2.392989 -1.523271  
C 2.666451 2.308610 1.283141  
C 3.237223 -1.176300 -1.836242  
C 1.899792 3.143021 0.269461  
C 3.072559 1.193169 -2.111486  
C 2.062175 2.325932 -2.047527  
H 0.703947 -3.340585 1.916730  
H 2.055678 -2.910181 2.990475  
H 1.774982 -1.102115 4.136650  
H 0.471174 0.023434 3.708357  
H 3.298789 -1.953386 1.033986

|   |          |           |           |
|---|----------|-----------|-----------|
| H | 2.852486 | -3.656730 | 0.763895  |
| H | 2.658473 | 1.172136  | 3.691153  |
| H | 3.297533 | 0.028474  | 2.484970  |
| H | 1.600507 | -2.497626 | -2.276932 |
| H | 3.003087 | -3.299373 | -1.527706 |
| H | 3.555171 | 1.836691  | 0.841939  |
| H | 2.996987 | 2.964566  | 2.101013  |
| H | 4.048516 | -1.043620 | -1.105318 |
| H | 3.692969 | -1.300895 | -2.828973 |
| H | 1.046314 | 3.618718  | 0.760198  |
| H | 2.556328 | 3.926694  | -0.128132 |
| H | 3.508690 | 1.154157  | -3.120245 |
| H | 3.892028 | 1.336514  | -1.392840 |
| H | 2.560768 | 3.285390  | -2.231968 |
| H | 1.297571 | 2.183479  | -2.817450 |
